# Supplementary material for: Advertising Contents of Child Health Drinks in India -An Analysis of Trends and Pattern
Source: Research Square preprint supplement (doi:10.21203/rs.3.rs-2070234/v1), 2022-10-04
Supplement: Supplementary file 1 [file 1c4d475e0c6924abebd381df.docx]

**Highlights**

**The primary objectives of this paper are drafted as follows,**

This paper's contribution can be summarized:

- To examine the trends of contents used in advertisements for the child health drinks market in India.
- To decipher the pattern of the content mixed in the advertisements for child health drinks.
- For fulfilling the primary objective of the study which is to understand the trend and pattern of child health drinks, content analysis has been done.
- For the advertisement under study, the paper has considered the broadcast media of advertisement (Television commercials).

Thank you very much

Yours

Dr. Ahmed A. Elngar (Corresponding Author)

Associate Professor

Faculty of Computers & Artificial Intelligence, Beni-Suef University, Beni-Suef City, 62511, Egypt.

Tel: 002 – 01007400752

e-mail: [elngar_7@yahoo.co.uk](mailto:elngar_7@yahoo.co.uk)
